# Supplementary material
Source: PubMed Central journal article supplement (PMC3910359)
Supplement: 97320630091023S1.pdf [file 97320630091023S1.pdf]

## Supplementary material:

**Table 1:** Docking interactions of amino acid residues of MAPT and CDK5 with interatomic distances.

| MAPT     | CDK5       | RMS (Å) |
|----------|------------|---------|
| GLN6 O   | ARG217 H   | 2.38    |
| GLY9 H   | GLN273 H   | 2.22    |
| ARG15 H  | GLN282 O   | 2.42    |
| ARG56 H  | ARG156 H   | 2.64    |
| ALA66 O  | SER276 H   | 2.10    |
| LYS209 H | GLU224 OE2 | 1.67    |
| THR205 H | PRO228 O   | 1.36    |

**Table 2:** Docking interactions of amino acid residues of MAPT and GSK3B with interatomic distances.

| MAPT       | GSK3B      | RMS (Å) |
|------------|------------|---------|
| GLY76 H    | GLU279 OE2 | 2.40    |
| THR95 OEG1 | GLN273 H   | 2.63    |

**Table 3:** Phosphorylation of MAPT with CDK5

| Site | Residue | Sequence | Modification state | Kinase type | Score |
|------|---------|----------|--------------------|-------------|-------|
| 53   | T       | IGDTPSL  | modified           | CDK5        | 1.0   |
| 97   | T       | KIATPRG  | modified           | CDK5        | 1.0   |
| 117  | T       | PAKTPPA  | modified           | CDK5        | 1.0   |
| 144  | S       | SPGSPGT  | modified           | CDK5        | 1.0   |
| 150  | S       | TPGSRSR  | modified           | CDK5        | 1.0   |
| 154  | T       | RSRTPSL  | modified           | CDK5        | 1.0   |
| 173  | T       | VVRTPPK  | modified           | CDK5        | 1.0   |
| 177  | S       | PPKSPSS  | modified           | CDK5        | 1.0   |
| 315  | S       | GDTSPRH  | modified           | CDK5        | 1.0   |
| 333  | S       | MVDSPQL  | modified           | CDK5        | 1.0   |
| 123  | T       | APKTPPS  | modified           | CDK5        | 0.71  |
| 147  | T       | SPGTPGS  | modified           | CDK5        | 0.67  |
| 288  | T       | HKLTFRE  | modified           | CDK5        | 0.6   |
| 159  | T       | SLPTPPI  | modified           | CDK5        | 0.57  |

**Table 4:** Phosphorylation of MAPT with GSK3B

| Site | Residue | Sequence | Modification state | Kinase type | Score |
|------|---------|----------|--------------------|-------------|-------|
| 53   | T       | IGDTPSL  | modified           | GSK3B       | 0.78  |
| 117  | T       | PAKTPPA  | modified           | GSK3B       | 0.75  |
| 95   | T       | KIATPRG  | modified           | GSK3B       | 0.64  |
| 315  | S       | GDTSPRH  | modified           | GSK3B       | 0.64  |
| 307  | S       | VYKSPVV  | modified           | GSK3B       | 0.56  |

**Table 5:** ATP interacting residues of CDK5 and GSK3B kinases

| Protein kinase | ATP interacting residues                                                                                                                                                                                                                                                                                                                                                                                                                                                       |
|----------------|--------------------------------------------------------------------------------------------------------------------------------------------------------------------------------------------------------------------------------------------------------------------------------------------------------------------------------------------------------------------------------------------------------------------------------------------------------------------------------|
| CDK5           | 2, 3, 6,7, 8, 29, 34, 35, 39, 40, 42, 43, 45, 47, 48, 51, 53, 54, 55, 57, 62, 64, 65, 70, 74, 78, 79, 81, 82, 83, 84, 86, 93, 103, 106, 107, 108, 109, 110, 111, 112, 123, 125, 126, 127, 128, 129, 131, 132, 136, 137, 138, 140, 149, 151, 154, 156, 157, 158, 159, 160, 161, 162, 165, 167, 168, 171, 173, 175, 176.                                                                                                                                                         |
| GSK3B          | 1, 2, 3,4, 13, 14, 17, 20, 22, 24, 26, 27, 36, 38, 41, 42, 54, 57, 58, 63, 64, 66, 67, 68, 69, 70, 71, 72, 74, 78, 81, 84, 87, 88, 93, 99, 102, 104, 105, 107, 108, 110, 111, 112, 120, 124, 125, 126, 127, 128, 129, 131, 132, 135, 139, 140, 141, 142, 143, 145, 146, 148, 151, 158, 163, 164, 167, 173, 179, 181, 184, 187, 195, 196, 197, 200, 201, 202, 209, 211, 213, 214, 220, 223, 225, 226, 229,231, 232, 233, 235, 236, 241, 246, 248, 253, 259, 261, 264, 269, 270. |

**Table 6:** List of amino acid residues in CDK5 and GSK3B which are acting as stabilization centers with MAPT. The stabilization residues also acting as ATP interacting residues are shown in bold.

| Protein kinase | Stabilization centers in complex with MAPT                                                                                                                                                                                                                                                                                                                                                                                             |
|----------------|----------------------------------------------------------------------------------------------------------------------------------------------------------------------------------------------------------------------------------------------------------------------------------------------------------------------------------------------------------------------------------------------------------------------------------------|
| CDK5           | 4, 5, 6, 13, 14, 17, 18, 19, 26, 27, 28, 29, 30, 31, 32, 47, 50, 56, 58, 59, 61, 62, 63, <b>71,72, 75</b> , 76, 80, 81, 82, 83, 103, 109, 110, 112, 118, 119, <b>120</b> , 121, 128, 129, 130, 137, 138, 142, 143, 144, 145, 146, 166, 169, 171, 179, 181, <b>185</b> , 192, 200, 208, 210, 211, 230, 248, 249, <b>251</b> , 252, 259, 262, <b>282</b> , 286                                                                           |
| GSK3B          | 40,41, <b>42</b> , 43, 44, 52, <b>53</b> , 56, 57, 58, 59, 60, <b>61, 71, 72</b> , 73, <b>74, 75</b> , 82, 83, 84, 85, 86, 87, 88, 89, 103, 104, 106, 108, 109, 111, 112, 113, 114, 115, 116, 117, <b>127</b> , 128, 129, <b>130</b> , 131, 132, 133, 136, 137, 138, 139, 159, 163, 168, 169, 171, 175, 178, 179, 180, 187, <b>188</b> , 189, 190, 193, 197, 198, 203, 204, 205, 214, 225, 232, 240, 258, 266, 268, 283, 324, 333, 342 |

**Table 7:** List of amino acids acting as stabilizing residues in CDK5 and GSK3B kinases. The stabilizing residues involves in ATP interaction are shown in bold.

| Protein kinase | Stabilization residues                       |
|----------------|----------------------------------------------|
| CDK5           | ALA31, PHE80, ASP86, GLY113, LYS141, LEU142  |
| GSK3B          | LYS85, LYS86, LEU130, VAL131, LEU132, LYS197 |

**Table 8:** The summary of results from the various *insilico* methods

| Methods                                          | MAPT and CDK5 | MAPT and GSK3B |
|--------------------------------------------------|---------------|----------------|
| Protein-Protein docking and interacting residues | 7             | 2              |
| Predicted no. of phosphorylation sites           | 14            | 5              |
| Predicated no. of ATP binding sites              | 70            | 112            |
| Predicated no. of stabilization centers          | 69            | 80             |
| Predicated no. of stabilization residues         | 6             | 6              |
